# Supplementary material
Source: PubMed Central journal article supplement (PMC2951867)
Supplement: supp_ddq340_ddq340supp.pdf [file supp_ddq340_ddq340supp.pdf]

## Supplementary iTRAQ Methods for Wishart et al.

### *MS Parameters:*

MS Method Name: Optimised\_iTRAQ\_101209

### *Nano LC System:*

#### Buffers

A: 2% acetonitrile in 0.1% formic acid

B: 90% acetonitrile in 0.08% formic acid

| Time (min) | %B   |
|------------|------|
| 0.00       | 5.0  |
| 3.00       | 5.0  |
| 128.00     | 45.0 |
| 130.00     | 90.0 |
| 140.00     | 90.0 |
| 141.00     | 5.0  |
| 160.00     | 5.0  |

Linear gradient from 5 to 45 %B over 125 min

Flowrate: 300nl/min

### *Capillary LC System:*

A: 2% acetonitrile in 0.1% formic acid

Isocratic flow of A

Flowrate: 4ul/min

Chip Cube: Microfluidic chip - enrichment chip C18

(160nl C18 Trap Column with 75um x 150mm C18 Column)

### *MS-Q-TOF*

#### *General:*

Source: HPLC-Chip

Ion mode: Positive

Data collection: Both (Profile and Centroid)

Gas Temp: 300 oC

Drying gas: 4 L/min

Vcap: 2050 V

Fragmentor: 150 V

Skimmer: 65 V

OCT1 RF Vpp: 750 V

#### *Acquisition:*

Auto MS/MS Mode

Spectral Parameters:

MS:

Range: 335 – 2500 m/z

Acquisition Rate/Time: 5 Spectra per sec/200msec

MS/MS:

Range: 50 – 3000 m/z

Acquisition Rate/Time: 4 spectra per sec/250 msec

Isolation width: ~4 m/z

*Collision Energy:*

Use Table:

| m/z  | z=1     | z=2    | z=3    | z>3    |
|------|---------|--------|--------|--------|
| 100  | 12.726  | 16.632 | 12.726 | 15.498 |
| 500  | 37.422  | 18.270 | 25.578 | 28.350 |
| 1000 | 72.072  | 43.218 | 47.124 | 49.896 |
| 1500 | 106.722 | 68.166 | 68.544 | 71.316 |

*Precursor Selection I:*

Max Precursor Per Cycle: 20

Abs Threshold: 2000

Rel Threshold %: 0.01

Active Exclusion: Enabled

Exclude after: 2

Release after (min): 0.1

State Exclusion Range List

Start m/z: 100

End m/z: 335

*Precursor Selection II:*

Precursor Charge State Selection and Preference

Inactive: 1

Active: 2,3,>3, Unk

Sort Precursors by Charge State then Abundance

Scan Speed Varied based on Precursor Abundance: Enabled

*Ref Mass:*

Reference Mass Correction: Enabled

445.120036

Average (scans): 5

Detection Window (ppm): 100

Min Height (counts): 1000

*Chromatogram:*

TIC

BPC

*MASCOT parameters:*

Submitted from TW-214-2009-QTOF-iTRAQ4plex-IPIMouse-090210-116Denom by Mascot Daemon on LS18923

MS data file : D:\Mascot Daemon\mgf\384 TW-214-2009-QTOF-iTRAQ4plex-IPIMouse-090210-116Denom\mascot\_daemon\_merge.mgf

Database : IPI-mouse 20100131 (56729 sequences; 25496102 residues)

Quantitation : DJL-iTRAQ-2plex-116Denominator-090210

Method details : Applied Biosystems iTRAQ(TM) 4-plex reagent

Timestamp : 9 Feb 2010 at 13:47:46 GMT

Enzyme : Trypsin/P

Fixed modifications : Carbamidomethyl (C),iTRAQ4plex (N-term),iTRAQ4plex (K)

Variable modifications : Acetyl (N-term),Dioxidation (M),Gln->pyro-Glu (N-term Q),Oxidation (M)

Mass values : Monoisotopic

Protein Mass : Unrestricted

Peptide Mass Tolerance :  $\pm 20$  ppm (# 13C = 2)

Fragment Mass Tolerance:  $\pm 0.1$  Da

Max Missed Cleavages : 2

Instrument type : ESI-TRAP

Number of queries : 219347

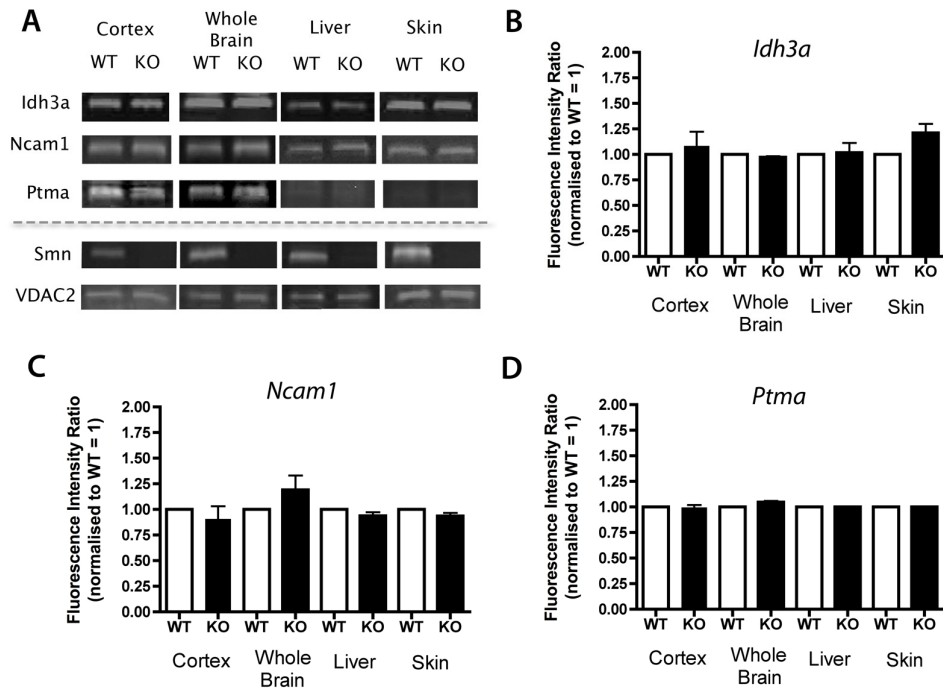

**Supplementary Figure 1. Proteins identified in the proteomics screen of SMA mouse hippocampus remained unchanged in other brain regions and non-neuronal tissues.** A - Representative fluorescent western blots showing expression levels of *Idh3a*, *Ncam1* and *Ptma* in the cortex, whole brain (minus the cortex), liver and skin (from tail tip) of *Smn*<sup>-/-</sup>; *SMN2* (KO) mice and wild-type littermates (WT) at P5. *Smn* protein levels are shown to confirm the genetic status of the *Smn*<sup>-/-</sup>; *SMN2* mice and *VDAC2* protein is shown as a loading control. Note no major expression changes for any of the proteins in any of the tissues examined. *Ptma* was not strongly expressed in liver and skin. B-D – Bar charts (mean±SEM) showing relative expression levels of *Idh3a* (B), *Ncam1* (C) and *Ptma* (D) in wild-type (black bars) and *Smn*<sup>-/-</sup>; *SMN2* (white bars) mice at P5.
